# Supplementary material for: TIME TO LUNG VOLUME STABILITY AFTER PRESSURE CHANGE DURING HIGH-FREQUENCY OSCILLATORY VENTILATION
Source: bioRxiv or medRxiv preprint supplement (doi:10.1101/2021.01.28.21250723), 2021-02-01
Supplement: Supplementary file [file media-1.pdf]

# TIME TO LUNG VOLUME STABILITY AFTER PRESSURE CHANGE DURING HIGH-FREQUENCY OSCILLATORY VENTILATION

David G Tingay PhD, Nicholas Kiraly FRACP, John F Mills PhD, Peter A Dargaville MD

## Supplementary Material

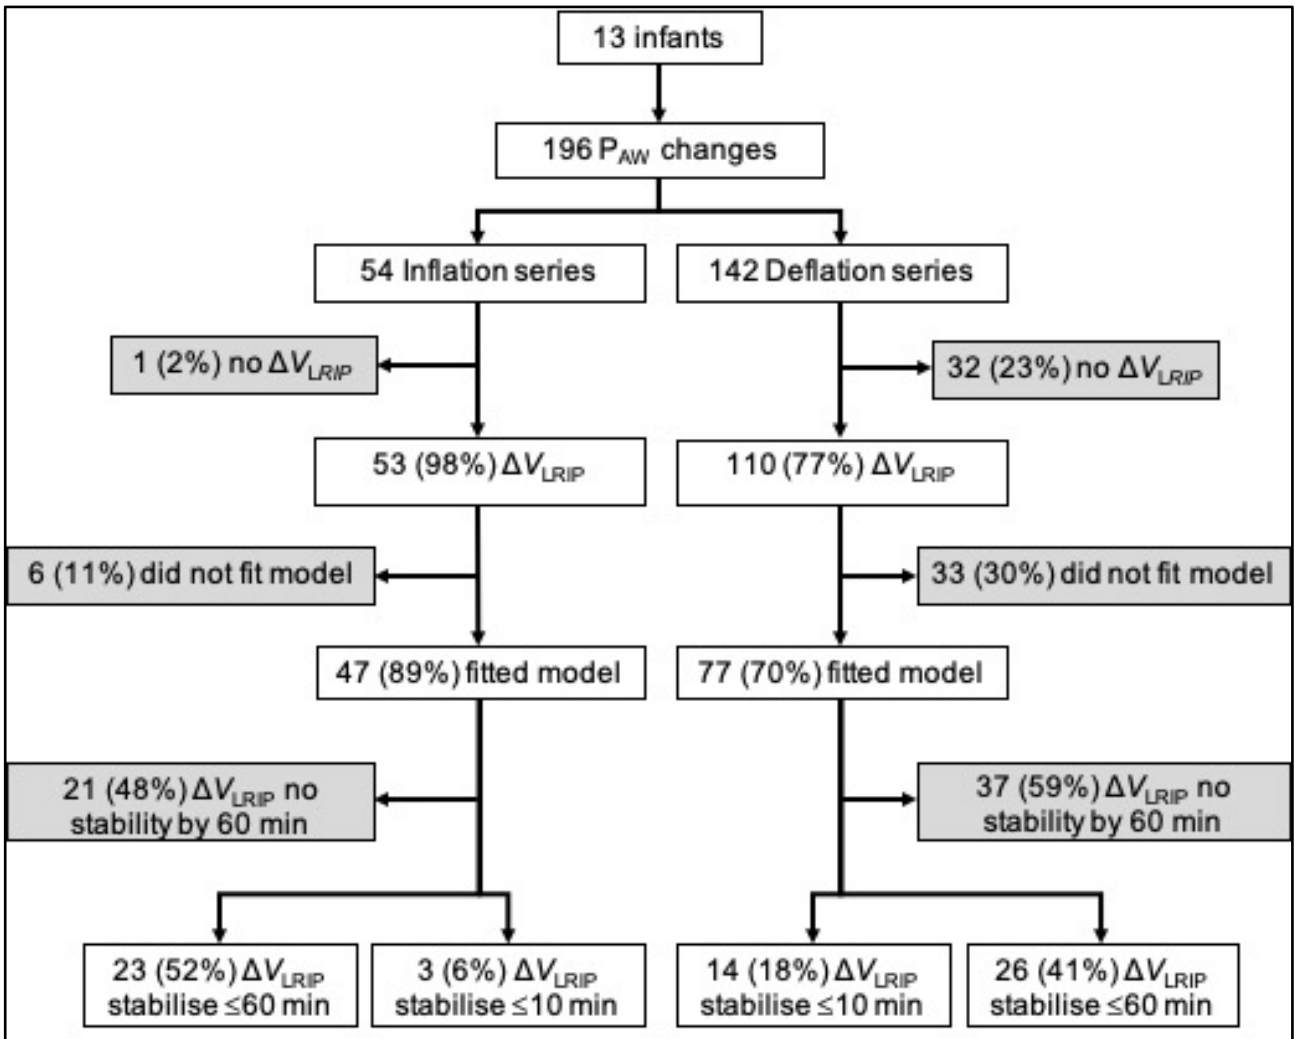

Supplementary Figure 1. Study analysis flow chart
